# Supplementary material for: Metagenomic analysis of the Rhinopithecus bieti fecal microbiome reveals a broad diversity of bacterial and glycoside hydrolase profiles related to lignocellulose degradation
Source: PubMed Central journal article supplement (PMC4369366; doi:10.1186/s12864-015-1378-7), 2015-03-12
Supplement: 12864_2015_1378_MOESM1_ESM.pdf [file 12864_2015_1378_MOESM1_ESM.pdf]

## Additional file 1 Information regarding the sequence datas

---

| <i>R. bieti</i> metagenome           |             |
|--------------------------------------|-------------|
| <b>Raw data</b>                      |             |
| Total # of reads                     | 97,942      |
| Total bp                             | 37,482,416  |
| Mean length (bp)                     | 382 ± 98 bp |
| Mean GC %                            | 45 ± 12 %   |
| <b>MG-RAST Analysis</b>              |             |
| Total # of reads                     | 97,942      |
| Total bp                             | 37,482,416  |
| Mean length (bp)                     | 382 ± 98 bp |
| Mean GC %                            | 45 ± 12 %   |
| Total # of reads post QC             | 88,514      |
| Total bp post QC                     | 35,073,599  |
| Mean length post QC (bp)             | 396 ± 82 bp |
| Mean GC % post QC                    | 45 ± 12 %   |
| Processed predicted protein features | 90,920      |
| Processed predicted rRNA features    | 9,679       |

---

QC: MG-RAST 3.0 applied quality control of the reads.
