# Supplementary material for: Metagenomic analysis of the Rhinopithecus bieti fecal microbiome reveals a broad diversity of bacterial and glycoside hydrolase profiles related to lignocellulose degradation
Source: PubMed Central journal article supplement (PMC4369366; doi:10.1186/s12864-015-1378-7), 2015-03-12
Supplement: 12864_2015_1378_MOESM7_ESM.pdf [file 12864_2015_1378_MOESM7_ESM.pdf]

**Additional file 7 Presence of carbohydrate active enzyme families in the *R. bieti* metagenome**

| <b>GH family*</b> | <b>Sequence #</b> | <b>% of total GH</b> | <b>GT family*</b> | <b>Sequence #</b> | <b>% of total GT</b> |
|-------------------|-------------------|----------------------|-------------------|-------------------|----------------------|
| GH1               | 12                | 0.92%                | GT1               | 7                 | 0.94%                |
| GH2               | 106               | 8.11%                | GT2               | 268               | 36.12%               |
| GH3               | 83                | 6.35%                | GT3               | 6                 | 0.81%                |
| GH4               | 14                | 1.07%                | GT4               | 189               | 25.47%               |
| GH5               | 35                | 2.68%                | GT5               | 37                | 4.99%                |
| GH8               | 1                 | 0.08%                | GT8               | 14                | 1.89%                |
| GH9               | 12                | 0.92%                | GT10              | 1                 | 0.13%                |
| GH10              | 13                | 0.99%                | GT11              | 1                 | 0.13%                |
| GH11              | 1                 | 0.08%                | GT14              | 4                 | 0.54%                |
| GH13              | 165               | 12.62%               | GT19              | 9                 | 1.21%                |
| GH16              | 21                | 1.61%                | GT20              | 3                 | 0.40%                |
| GH17              | 2                 | 0.15%                | GT25              | 3                 | 0.40%                |
| GH18              | 19                | 1.45%                | GT26              | 10                | 1.35%                |
| GH19              | 1                 | 0.08%                | GT28              | 44                | 5.93%                |
| GH20              | 38                | 2.91%                | GT30              | 9                 | 1.21%                |
| GH23              | 29                | 2.22%                | GT32              | 10                | 1.35%                |
| GH24              | 10                | 0.77%                | GT35              | 71                | 9.57%                |
| GH25              | 31                | 2.37%                | GT39              | 7                 | 0.94%                |
| GH26              | 9                 | 0.69%                | GT41              | 2                 | 0.27%                |
| GH27              | 9                 | 0.69%                | GT50              | 1                 | 0.13%                |
| GH28              | 31                | 2.37%                | GT51              | 28                | 3.77%                |
| GH29              | 24                | 1.84%                | GT55              | 1                 | 0.13%                |
| GH30              | 15                | 1.15%                | GT56              | 1                 | 0.13%                |
| GH31              | 20                | 1.53%                | GT66              | 1                 | 0.13%                |
| GH32              | 6                 | 0.46%                | GT70              | 1                 | 0.13%                |
| GH33              | 15                | 1.15%                | GT82              | 1                 | 0.13%                |
| GH35              | 18                | 1.38%                | GT83              | 6                 | 0.81%                |
| GH36              | 28                | 2.14%                | GT84              | 7                 | 0.94%                |
| GH37              | 2                 | 0.15%                | <b>Totle GT</b>   | <b>742</b>        | <b>100.00%</b>       |
| GH38              | 28                | 2.14%                |                   |                   |                      |
| GH39              | 4                 | 0.31%                | <b>CE family*</b> | <b>Sequence #</b> | <b>% of total CE</b> |
| GH42              | 13                | 0.99%                | CE1               | 28                | 18.42%               |
| GH43              | 61                | 4.67%                | CE2               | 6                 | 3.95%                |
| GH45              | 1                 | 0.08%                | CE3               | 2                 | 1.32%                |
| GH50              | 3                 | 0.23%                | CE4               | 48                | 31.58%               |
| GH51              | 12                | 0.92%                | CE7               | 4                 | 2.63%                |
| GH53              | 8                 | 0.61%                | CE8               | 9                 | 5.92%                |
| GH55              | 4                 | 0.31%                | CE9               | 27                | 17.76%               |
| GH57              | 16                | 1.22%                | CE11              | 8                 | 5.26%                |
| GH59              | 1                 | 0.08%                | CE12              | 7                 | 4.61%                |
| GH63              | 6                 | 0.46%                | CE14              | 9                 | 5.92%                |

|                 |             |                |                    |                   |                       |
|-----------------|-------------|----------------|--------------------|-------------------|-----------------------|
| GH64            | 3           | 0.23%          | CE15               | 4                 | 2.63%                 |
| GH65            | 11          | 0.84%          | <b>Totle CE</b>    | <b>152</b>        | <b>100.00%</b>        |
| GH67            | 1           | 0.08%          |                    |                   |                       |
| GH73            | 19          | 1.45%          | <b>PL family*</b>  | <b>Sequence #</b> | <b>% of total PL</b>  |
| GH74            | 1           | 0.08%          | PL1                | 6                 | 21.43%                |
| GH76            | 6           | 0.46%          | PL6                | 1                 | 3.57%                 |
| GH77            | 43          | 3.29%          | PL9                | 1                 | 3.57%                 |
| GH78            | 25          | 1.91%          | PL10               | 5                 | 17.86%                |
| GH79            | 1           | 0.08%          | PL11               | 9                 | 32.14%                |
| GH81            | 5           | 0.38%          | PL12               | 1                 | 3.57%                 |
| GH84            | 1           | 0.08%          | PL15               | 2                 | 7.14%                 |
| GH85            | 2           | 0.15%          | PL17               | 3                 | 10.71%                |
| GH87            | 1           | 0.08%          | <b>Totle PL</b>    | <b>28</b>         | <b>100.00%</b>        |
| GH88            | 7           | 0.54%          |                    |                   |                       |
| GH89            | 7           | 0.54%          | <b>CBM family*</b> | <b>Sequence #</b> | <b>% of total CBM</b> |
| GH92            | 54          | 4.13%          | CBM3               | 2                 | 2.33%                 |
| GH94            | 25          | 1.91%          | CBM4               | 9                 | 10.47%                |
| GH95            | 19          | 1.45%          | CBM6               | 6                 | 6.98%                 |
| GH97            | 35          | 2.68%          | CBM9               | 3                 | 3.49%                 |
| GH98            | 1           | 0.08%          | CBM12              | 3                 | 3.49%                 |
| GH102           | 1           | 0.08%          | CBM13              | 5                 | 5.81%                 |
| GH103           | 2           | 0.15%          | CBM16              | 3                 | 3.49%                 |
| GH105           | 18          | 1.38%          | CBM26              | 1                 | 1.16%                 |
| GH106           | 18          | 1.38%          | CBM30              | 1                 | 1.16%                 |
| GH108           | 1           | 0.08%          | CBM32              | 14                | 16.28%                |
| GH109           | 10          | 0.77%          | CBM33              | 1                 | 1.16%                 |
| GH110           | 5           | 0.38%          | CBM34              | 3                 | 3.49%                 |
| GH111           | 2           | 0.15%          | CBM35              | 2                 | 2.33%                 |
| GH112           | 1           | 0.08%          | CBM41              | 3                 | 3.49%                 |
| GH115           | 11          | 0.84%          | CBM48              | 12                | 13.95%                |
| GH116           | 1           | 0.08%          | CBM50              | 7                 | 8.14%                 |
| GH120           | 4           | 0.31%          | CBM51              | 2                 | 2.33%                 |
| GH123           | 3           | 0.23%          | CBM54              | 1                 | 1.16%                 |
| GH125           | 9           | 0.69%          | CBM57              | 3                 | 3.49%                 |
| GH126           | 1           | 0.08%          | CBM61              | 1                 | 1.16%                 |
| GH127           | 12          | 0.92%          | CBM62              | 4                 | 4.65%                 |
| GH128           | 2           | 0.15%          | <b>Totle CBM</b>   | <b>86</b>         | <b>100.00%</b>        |
| GH130           | 12          | 0.92%          |                    |                   |                       |
| <b>Totle GH</b> | <b>1307</b> | <b>100.00%</b> |                    |                   |                       |

\* Based on CAZy database ([www.cazy.org](http://www.cazy.org))
