# Supplementary material for: Metagenomic analysis of the Rhinopithecus bieti fecal microbiome reveals a broad diversity of bacterial and glycoside hydrolase profiles related to lignocellulose degradation
Source: PubMed Central journal article supplement (PMC4369366; doi:10.1186/s12864-015-1378-7), 2015-03-12
Supplement: 12864_2015_1378_MOESM9_ESM.pdf [file 12864_2015_1378_MOESM9_ESM.pdf]

**Additional file 9 Overview of the MG-RAST metagenomes chosen for comparison**

| <b>Metagenome<br/>(MG-RAST accession)</b> | <b>Host</b>          | <b>Sequence number</b> | <b>Total Size<br/>MB</b> | <b>Shortest</b> | <b>Longest</b> | <b>Average</b> |
|-------------------------------------------|----------------------|------------------------|--------------------------|-----------------|----------------|----------------|
| JSH (4452795.3)                           | <i>R. bieti</i>      | 88514                  | 35.1                     | 100             | 700            | 396            |
| LMC (4440463.3)                           | Lean mouse           | 10845                  | 8.4                      | 77              | 1307           | 781.8          |
| OMC (4440464.3)                           | Obese mouse          | 11857                  | 9.1                      | 112             | 1187           | 764.7          |
| F1S (4440939.3)                           | Human                | 28900                  | 38                       | 92              | 16490          | 1315           |
| HSM (4444130.3)                           | Malnourished Human   | 108486                 | 74.2                     | 93              | 160132         | 684            |
| CCA (4440283.3)                           | Chicken              | 310801                 | 32.3                     | 39              | 258            | 103            |
| CCB (4440284.3)                           | Chicken              | 254712                 | 26.4                     | 40              | 249            | 103            |
| K9C (4444164.3)                           | Dog (low-fiber diet) | 66969                  | 53.2                     | 44              | 36188          | 794            |
| K9BP (4444165.3)                          | Dog (beet pulp diet) | 67761                  | 43.6                     | 41              | 14401          | 642            |
| CRP (4441682.3)                           | Cow                  | 218460                 | 22.5                     | 35              | 193            | 102            |
| WFH (4476304.3)                           | Pygmy loris          | 61281                  | 27.2                     | 49              | 1201           | 443            |
